# Supplementary material
Source: PubMed Central journal article supplement (PMC3870802)
Supplement: mmc1.pdf [file mmc1.pdf]

## Supporting Material for

### The nanomechanical properties of Lipid Membranes are significantly influenced by the presence of Ethanol

Frank Stetter and Thorsten Hugel

IMETUM, Physik-Department, Technische Universität München, Munich, Germany

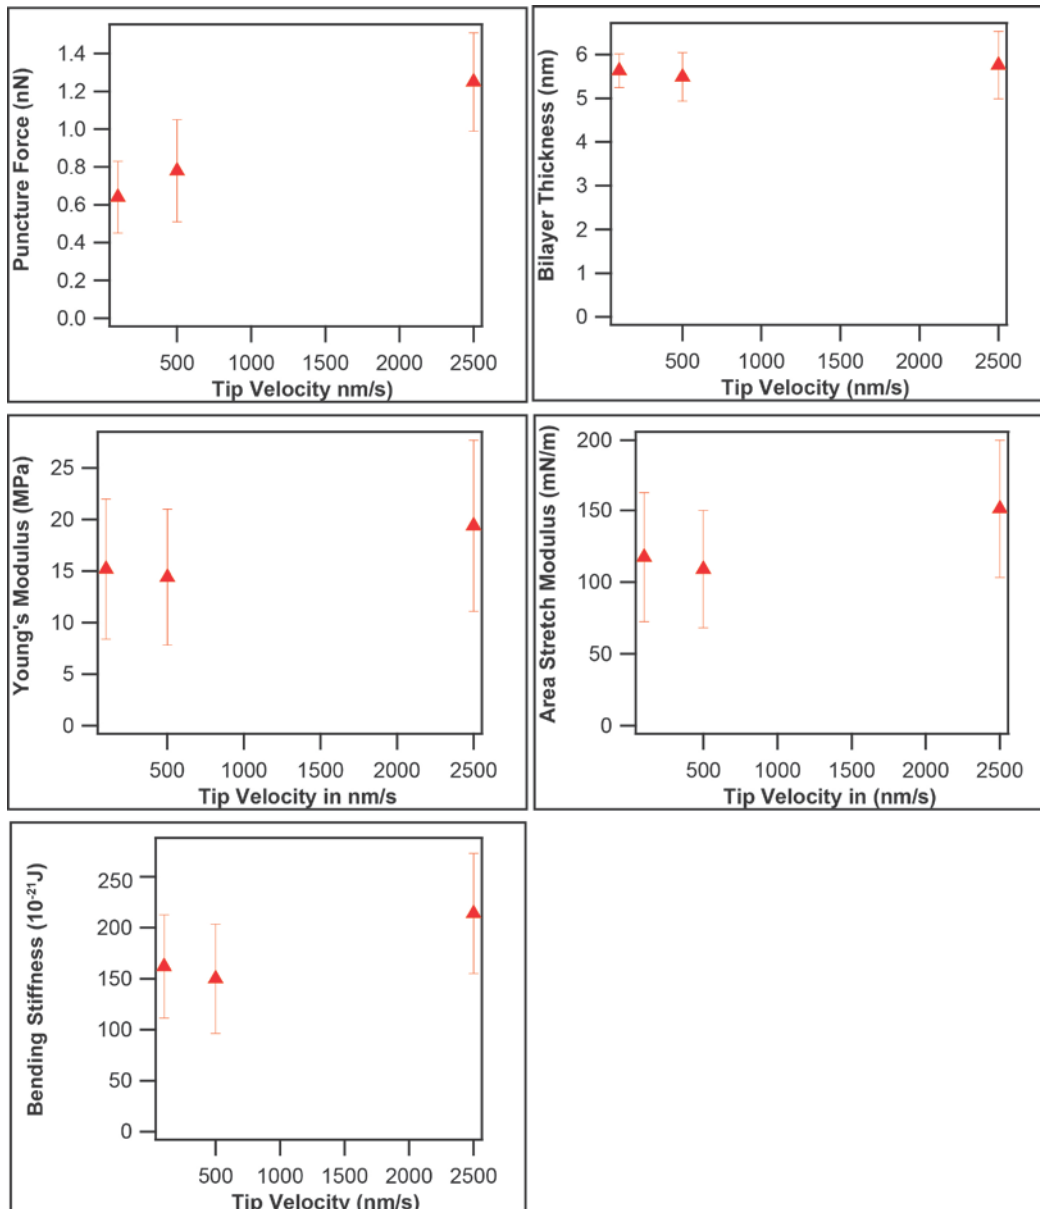

FIGURE S1 Velocity dependence of bilayer elastic properties for the DOPC rich fluid supported lipid bilayer (modified Hertz model applied). (A) Puncture Force, (B) Bilayer Thickness, (C) Young's Modulus, (D) Area Stretch Modulus, (E) Bending Stiffness.

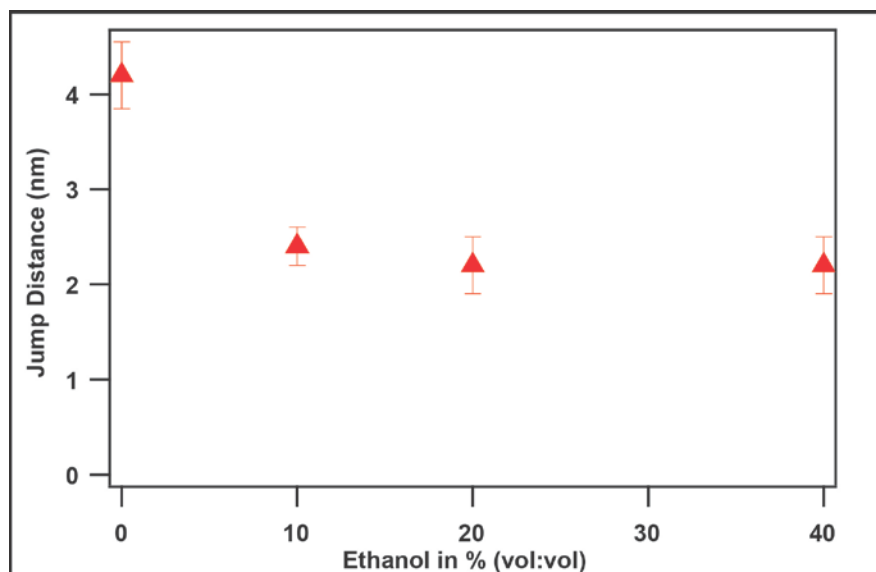

FIGURE S2 Cantilever jump distances for different ethanol concentrations.
